# Supplementary material for: Investigating the remediation potential of iron oxide nanoparticles in Cu-polluted soil–plant systems: coupled geochemical, geophysical and biological approaches
Source: Royal Society of Chemistry journal article supplement (doi:10.1039/d0na00825g), 2021-01-01
Supplement: d0na00825g1.pdf [file d0na00825g1.pdf]

## Supporting information

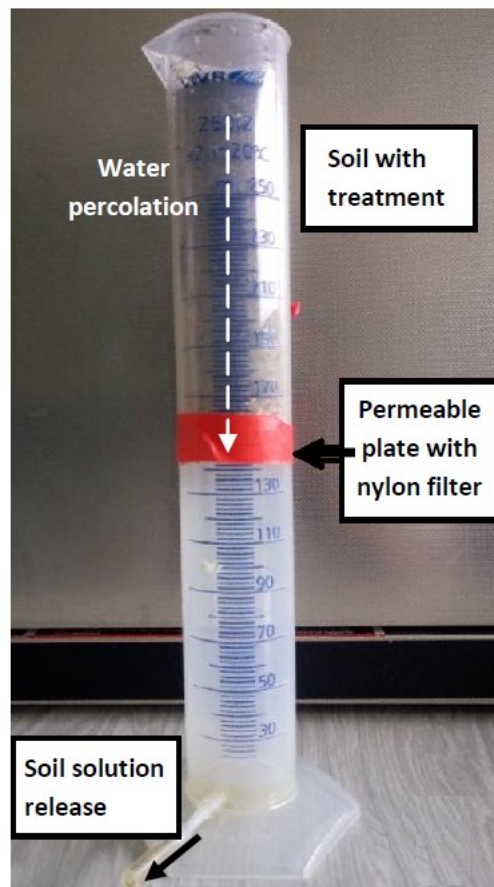

**Figure S1:** Experimental set-up of soil columns in a 250 mL measuring cylinder (VWR).

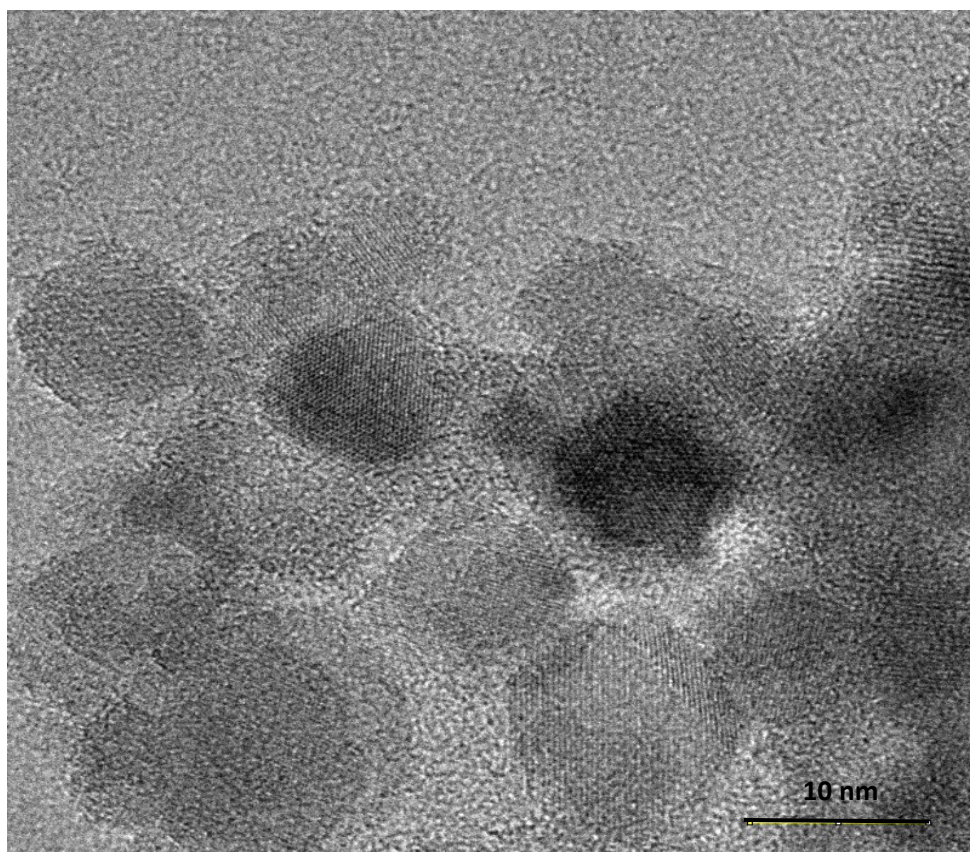

**Figure S2:** High resolution TEM observation of magnNPs in aqueous suspension

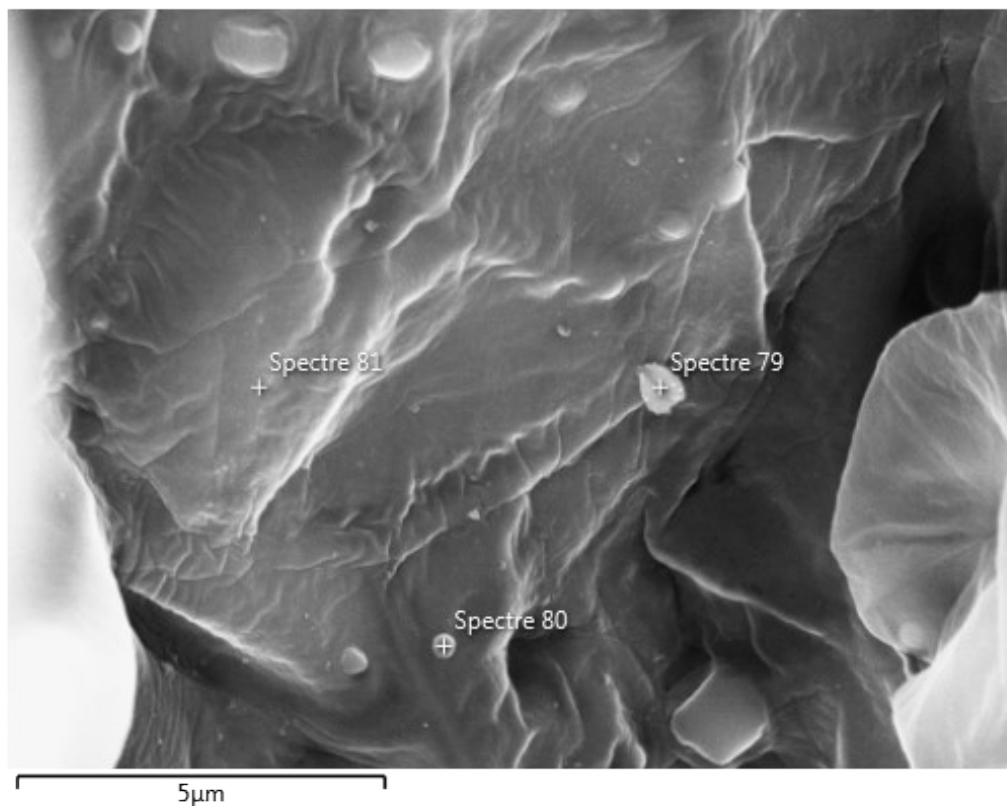

|                 | <b>C</b> | <b>O</b> | <b>Al</b> | <b>P</b> | <b>K</b> | <b>Fe</b> |
|-----------------|----------|----------|-----------|----------|----------|-----------|
| <b>Point 79</b> | 0.00     | 41.21    | 6.64      | 10.88    | 17.82    | 23.45     |
| <b>Point 80</b> | 0.00     | 0.00     | 10.48     | 0.00     | 36.73    | 52.79     |
| <b>Point 81</b> | 55.12    | 33.37    | 1.80      | 0.00     | 4.83     | 4.87      |

**Figure S3:** SEM image showing the deposition of magnNPs aggregates (points 79 and 80) on the surface of the plant roots. EDS of the targeted points (79, 80 and 81) are shown in the table displayed below the SEM picture (weight %).

**Table S1:** Physico-chemical characteristics of soils sampled in the wetland area of Pleine-Fougères (Brittany, France). The analyses were performed in the ISAE, Analytical laboratory (Combourg, France).

| pH                   | CEC<br>(meq/100g)                  | MO (%)                             | C/N     | Cd (ppm) | Cr (ppm) | Cu (ppm)              | Ni (ppm)             | Pb (ppm)             | Zn (ppm)                          |
|----------------------|------------------------------------|------------------------------------|---------|----------|----------|-----------------------|----------------------|----------------------|-----------------------------------|
| 5.4                  | 15.6                               | 5.75                               | 10.1    | 0.29     | 84.30    | 20.26                 | 30.32                | 21.95                | 73.62                             |
| SiO <sub>2</sub> (%) | Al <sub>2</sub> O <sub>3</sub> (%) | Fe <sub>2</sub> O <sub>3</sub> (%) | MnO (%) | MgO (%)  | CaO (%)  | Na <sub>2</sub> O (%) | K <sub>2</sub> O (%) | TiO <sub>2</sub> (%) | P <sub>2</sub> O <sub>5</sub> (%) |
| 64.89                | 12.0                               | 4.03                               | 0.03    | 0.96     | 0.39     | 1.0                   | 1.85                 | 0.71                 | 0.15                              |

**Table S2:** Magnetic susceptibilities ( $\text{m}^3 \text{kg}^{-1}$ ) in the plant samples (stems, leaves, flowers and roots). Data represent mean  $\pm$  SEM (n= 4). Sunflower plants were exposed for 57 days to 1% magnNPs and/or Cu ( $500 \text{ mg kg}^{-1}$ ) in soil columns.

|                   | roots   |         | stems    |         | leaves   |         | flowers  |         |
|-------------------|---------|---------|----------|---------|----------|---------|----------|---------|
|                   | Mean    | SEM     | Mean     | SEM     | Mean     | SEM     | Mean     | SEM     |
| <b>Control</b>    | 4.8E-09 | 2.2E-09 | -4.3E-09 | 2.2E-10 | -1.9E-09 | 7.0E-10 | -4.1E-09 | 8.2E-10 |
| <b>magnNPs</b>    | 6.5E-07 | 1.1E-07 | 4.1E-09  | 1.9E-09 | -4.2E-09 | 5.7E-10 | -2.0E-09 | 1.3E-09 |
| <b>magnNPs-Cu</b> | 5.3E-07 | 2.9E-07 | 1.2E-09  | 1.0E-09 | -5.7E-09 | 1.1E-09 | -3.4E-09 | 1.5E-09 |
| <b>Cu</b>         | 1.9E-09 | 1.2E-09 | -2.4E-09 | 7.1E-10 | -4.5E-09 | 4.6E-10 | -5.6E-09 | 3.9E-09 |

**Table S3:** Magnetic susceptibilities ( $\text{m}^3 \text{kg}^{-1}$ ) in the plant tissues (roots and aerial parts - stems and leaves -) and in the soil samples (initially 1% wgt magnNPs). Data represent means  $\pm$  SEM. Sunflower plants were exposed for 95 days to 1% magnNPs and/or Cu ( $500 \text{ mg kg}^{-1}$ ) in soil columns. In each column, three sections (samples) were made regards to the height of the aerial parts (increasing height from AP1 to AP3) and depth (increasing depth from 1 to 3) for roots (R) and soils (S). Values in bold characters highlight significant changes in magnetic susceptibilities, relating to magnNPs occurrence.

|              |     | Control  |         | magnNPs        |         | Cu       |         | magnNPs-Cu     |         |
|--------------|-----|----------|---------|----------------|---------|----------|---------|----------------|---------|
|              |     | Mean     | SEM     | Mean           | SEM     | Mean     | SEM     | Mean           | SEM     |
| Aerial parts | AP3 | -1.0E-08 | 5.0E-09 | -2.8E-08       | 6.2E-09 | -5.8E-09 | 2.0E-09 | -3.3E-08       | 9.7E-09 |
|              | AP2 | -7.1E-09 | 2.4E-09 | -1.2E-08       | 1.0E-08 | -4.5E-09 | 1.4E-09 | -5.7E-09       | 1.9E-09 |
|              | AP1 | -1.1E-08 | 6.2E-09 | <b>1.4E-08</b> | 8.8E-09 | -2.4E-09 | 1.0E-09 | -1.5E-09       | 7.5E-10 |
| Roots        | R1  | -1.7E-09 | 1.9E-09 | <b>9.3E-07</b> | 2.4E-07 | 6.1E-10  | 3.7E-10 | <b>1.7E-07</b> | 3.2E-08 |
|              | R2  | 1.9E-09  | 5.7E-10 | <b>6.3E-07</b> | 1.6E-07 | 1.9E-09  | 6.1E-10 | <b>1.4E-07</b> | 6.2E-08 |
|              | R3  | 5.2E-09  | 2.2E-09 | <b>3.9E-07</b> | 4.9E-08 | 4.2E-09  | 2.0E-09 | <b>5.8E-07</b> | 1.5E-07 |
| Soil         | S1  | 7.1E-08  | 1.5E-09 | <b>5.9E-06</b> | 1.3E-07 | 6.8E-08  | 1.2E-09 | <b>7.3E-06</b> | 1.8E-07 |
|              | S2  | 6.9E-08  | 1.4E-09 | <b>5.5E-06</b> | 1.4E-07 | 6.8E-08  | 1.5E-09 | <b>6.7E-06</b> | 1.1E-07 |
|              | S3  | 6.9E-08  | 1.3E-09 | <b>5.8E-06</b> | 1.3E-07 | 6.9E-08  | 1.1E-09 | <b>6.4E-06</b> | 1.3E-07 |
